# Supplementary material for: A Molecular Dynamics Study of Single-Gas and Mixed-Gas N2 and CH4 Transport in Triptycene-Based Polyimide Membranes
Source: MDPI journal article supplement (doi:10.3390/polym15183811), 2023-09-18
Supplement: s1 [file s1]

# A Molecular Dynamics Study of Single-Gas and Mixed-Gas N<sub>2</sub> and CH<sub>4</sub> Transport in Triptycene-Based Polyimide Membranes

Ioannis Tanis <sup>1,\*</sup>, David Brown <sup>1</sup>, Sylvie Neyertz <sup>1</sup>, Milind Vaidya <sup>2</sup>, Jean-Pierre Ballaguet <sup>2</sup>, Sebastien Duval <sup>2</sup> and Ahmad Bahamdan <sup>2</sup>

<sup>1</sup> Univ. Savoie Mont Blanc, Univ. Grenoble Alpes, CNRS, Grenoble INP, LEPMI, 38000 Grenoble, France; david.brown@univ-smb.fr (D.B.); sylvie.neyertz@univ-smb.fr (S.N.)

<sup>2</sup> Saudi Aramco, Research & Development Center, P.O. Box 62, Dhahran 31311, Saudi Arabia; milind.vaidya@aramco.com (M.V.); peterball128@yahoo.fr (J.-P.B.); sebastien.duval@aramco.com (S.D.); ahmad.bahamdan@aramco.com (A.B.)

\* Correspondence: ioannis.tanis77@gmail.com

<sup>†</sup> Current address: Siemens Digital Industries Software, 2595 BN The Hague, The Netherlands.

## S1. Methane and nitrogen force field parameters

The symmetrical two-center Lennard-Jones plus point quadrupole pair potential (2CLJQ) from Vrabec et al. [1] was employed for the description of N<sub>2</sub>. It is a rigid model which considers two identical Lennard-Jones (LJ) sites ( $S_{N-N} = 3.3211 \text{ \AA}$ ,  $e_{N-N}/k_B = 34.897$ ) a distance  $1.0464 \text{ \AA}$  apart. An associated quadrupole moment is modeled by placing partial charges  $q_N = -0.5474$  on the LJ sites and a balancing counter charge at the centre of mass of the molecule,  $-2q_N$ . The dynamics of such systems with an interaction site not located at a mass point were solved within the framework of special constraints, as explained by Ciccotti *et al.* [2]. This potential was found to reproduce a number of thermophysical properties of nitrogen at the boiling point such as the gas and liquid density and the heat of vaporization [3].

Methane was also represented by a fully atomistic model. All potential parameters, including partial charges, were obtained from the flexible methane model of Yin and co-workers [4] ( $l_{C-H} = 1.111 \text{ \AA}$ ,  $S_{C-C} = 3.7595 \text{ \AA}$ ,  $e_{C-C}/k_B = 47.80$ ,  $S_{H-H} = 2.3876 \text{ \AA}$ ,  $e_{H-H}/k_B = 8.5546$ ;  $q_C = -0.36$ ,  $q_H = 0.09$ ). However, to ensure a rigid tetrahedral representation, we considered CH<sub>4</sub> as an H<sub>b</sub>-CH<sub>a2</sub>-H<sub>b</sub> molecule where the midpoint of the H<sub>a</sub>-H<sub>a</sub> vector remains on the bisector of the H<sub>b</sub>-C-H<sub>b</sub> bending angle and the aforementioned vector is maintained perpendicular to the vector joining the H<sub>b</sub> hydrogen atoms. The latter were considered as 'bonded' at a distance  $l_{H_b-H_b} = 1.8142 \text{ \AA}$ . All bond lengths were constrained using the SHAKE algorithm [2] and special CH<sub>2</sub> constraints were used to render the methane molecules completely rigid, as explained above. This allowed the integration of the equations of motion using a time step of 1 fs with no problems of equipartition of kinetic energy between the different modes. The assessment of the rigid model showed satisfactory agreement with experimental data regarding the thermophysical properties mentioned earlier [3].

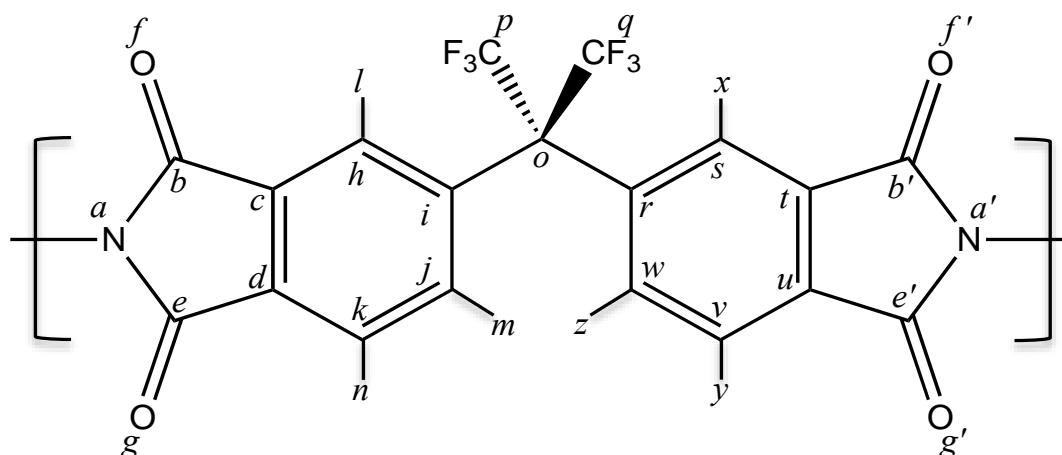

**Figure S1.** Structure of the 6FDA fragment. Letters in italics distinguish the different atoms whose charges are given in Table S1.

**Table S1.** Partial charges,  $q/e$ , on the atoms in the 6FDA fragment. An asterisk implies the same charge as the symmetrically equivalent atom.

|                | <i>a</i> | <i>b</i> | <i>c</i> | <i>d</i> | <i>e</i>  | <i>f</i>  | <i>g</i>  | <i>h</i>  | <i>i</i>  | <i>j</i> | <i>k</i> |
|----------------|----------|----------|----------|----------|-----------|-----------|-----------|-----------|-----------|----------|----------|
| BAPT-6FDA-BAPT | -0.3812  | 0.5697   | -0.0677  | -0.1345  | 0.5965    | -0.4461   | -0.4568   | -0.1467   | 0.2291    | -0.1428  | -0.0800  |
| mPDA-6FDA-mPDA | -0.4475  | 0.6045   | -0.0866  | -0.0963  | 0.5985    | -0.4502   | -0.4542   | -0.1499   | 0.2291    | -0.1488  | -0.0964  |
| BAPT-6FDA-mPDA | -0.3473  | 0.5792   | -0.1579  | -0.0587  | 0.5908    | -0.4807   | -0.4881   | -0.0833   | 0.1614    | -0.0839  | -0.1486  |
| mPDA-6FDA-BAPT | -0.3467  | 0.5798   | -0.1573  | -0.0581  | 0.5914    | -0.4801   | -0.4875   | -0.0827   | 0.1620    | -0.0833  | -0.1480  |
|                | <i>l</i> | <i>m</i> | <i>n</i> | <i>o</i> | <i>p</i>  | <i>q</i>  | <i>r</i>  | <i>s</i>  | <i>t</i>  | <i>u</i> | <i>v</i> |
| BAPT-6FDA-BAPT | 0.1340   | 0.1378   | 0.1344   | -0.4578  | 0.3949    | -0.1093   | *         | *         | *         | *        | *        |
| mPDA-6FDA-mPDA | 0.1331   | 0.1420   | 0.1395   | -0.4088  | 0.3855    | -0.1085   | *         | *         | *         | *        | *        |
| BAPT-6FDA-mPDA | 0.1416   | 0.1287   | 0.1436   | -0.4992  | 0.4524    | -0.1220   | 0.1988    | -0.1185   | -0.0845   | -0.1336  | -0.0922  |
| mPDA-6FDA-BAPT | 0.1422   | 0.1293   | 0.1442   | -0.4980  | 0.4530    | -0.1214   | 0.1994    | -0.1179   | -0.0839   | -0.1330  | -0.0916  |
|                | <i>w</i> | <i>x</i> | <i>y</i> | <i>z</i> | <i>a'</i> | <i>b'</i> | <i>e'</i> | <i>f'</i> | <i>g'</i> |          |          |
| BAPT-6FDA-BAPT | *        | *        | *        | *        | *         | *         | *         | *         | *         |          |          |
| mPDA-6FDA-mPDA | *        | *        | *        | *        | *         | *         | *         | *         | *         |          |          |
| BAPT-6FDA-mPDA | -0.1357  | 0.1466   | 0.1361   | 0.1407   | -0.2275   | -0.4655   | 0.5759    | -0.4655   | -0.4781   |          |          |
| mPDA-6FDA-BAPT | -0.1351  | 0.1472   | 0.1367   | 0.1413   | -0.2269   | 0.5125    | 0.5765    | -0.4649   | -0.4775   |          |          |

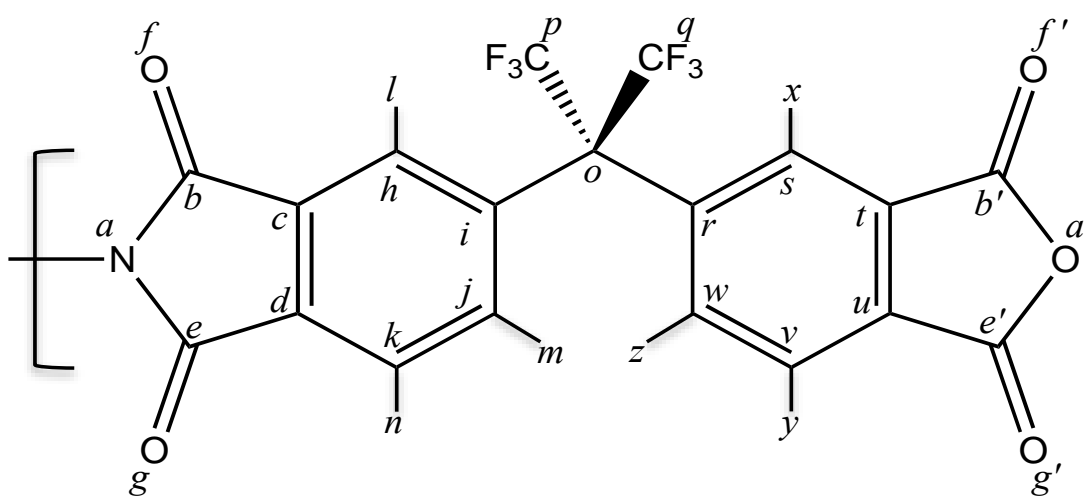

**Figure S2.** Structure of the 6FDA end fragment. Letters in italics distinguish the different atoms whose charges are given in Table S2.

**Table S2.** Partial charges,  $q/e$ , on the atoms in the 6FDA end fragment.

|               | <i>a</i> | <i>b</i> | <i>c</i> | <i>d</i> | <i>e</i>  | <i>f</i>  | <i>g</i>  | <i>h</i>  | <i>i</i>  | <i>j</i> | <i>k</i> |
|---------------|----------|----------|----------|----------|-----------|-----------|-----------|-----------|-----------|----------|----------|
| BAPT-6FDA_end | -0.2979  | 0.6346   | -0.2172  | -0.0475  | 0.5318    | -0.4825   | -0.4672   | -0.0909   | 0.3792    | -0.2117  | -0.1309  |
| mPDA-6FDA_end | -0.4054  | 0.5418   | -0.0342  | -0.1307  | 0.5915    | -0.4249   | -0.4487   | -0.1945   | 0.2658    | -0.1543  | -0.0877  |
|               | <i>l</i> | <i>m</i> | <i>n</i> | <i>o</i> | <i>p</i>  | <i>q</i>  | <i>r</i>  | <i>s</i>  | <i>t</i>  | <i>u</i> | <i>v</i> |
| BAPT-6FDA_end | 0.1352   | 0.1385   | 0.1476   | -0.5927  | 0.4292    | -0.1139   | 0.2913    | -0.1203   | -0.1375   | -0.1377  | -0.1135  |
| mPDA-6FDA_end | 0.1380   | 0.1448   | 0.1388   | -0.5362  | 0.4526    | -0.1212   | 0.3258    | -0.1749   | -0.0839   | -0.1566  | -0.0985  |
|               | <i>w</i> | <i>x</i> | <i>y</i> | <i>z</i> | <i>a'</i> | <i>b'</i> | <i>e'</i> | <i>f'</i> | <i>g'</i> |          |          |
| BAPT-6FDA_end | -0.2145  | 0.1281   | 0.1472   | 0.1428   | -0.3516   | 0.6704    | 0.6854    | -0.4490   | -0.4572   |          |          |
| mPDA-6FDA_end | -0.1335  | 0.1293   | 0.1450   | 0.1308   | -0.4282   | 0.6771    | 0.7000    | -0.4239   | -0.4317   |          |          |

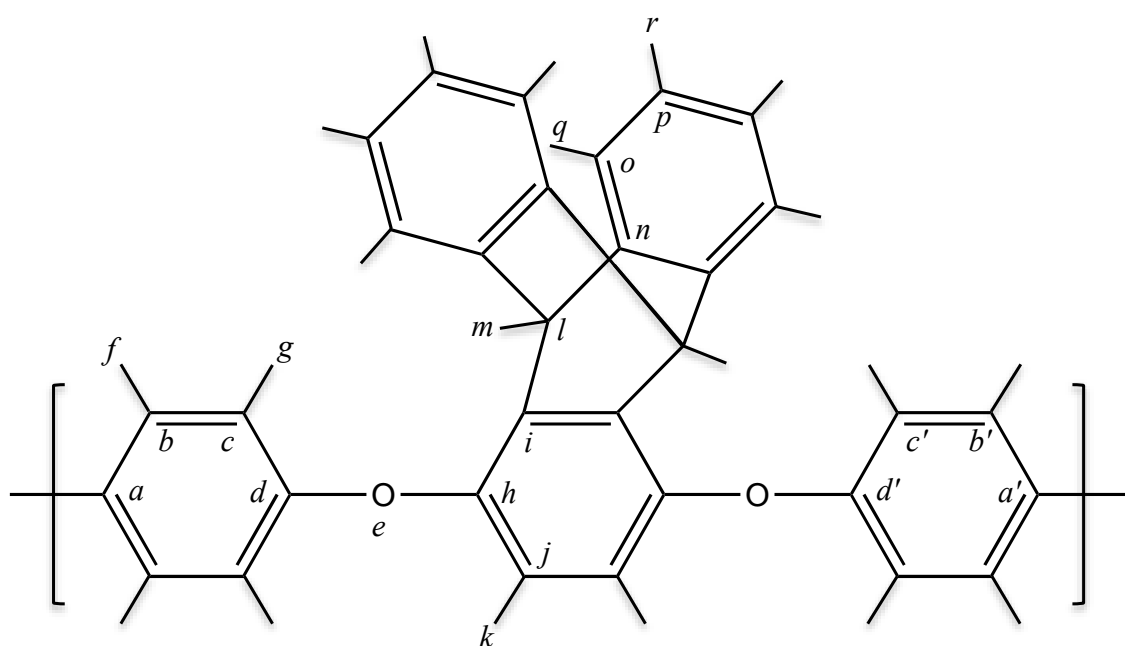**Figure S3.** Structure of the BAPT fragment. Letters in italics distinguish the different atoms whose charges are given in Table S3.**Table S3.** Partial charges,  $q/e$ , on the atoms in the BAPT fragment. An asterisk implies the same charge as the symmetrically equivalent atom.

|                | <i>a</i>  | <i>b</i>  | <i>c</i>  | <i>d</i>  | <i>e</i> | <i>f</i> | <i>g</i> | <i>h</i> | <i>i</i> |
|----------------|-----------|-----------|-----------|-----------|----------|----------|----------|----------|----------|
|                | 0.2483    | -0.2206   | -0.2053   | 0.3332    | -0.3522  | 0.1770   | 0.1498   | 0.2614   | -0.0999  |
|                | <i>j</i>  | <i>k</i>  | <i>l</i>  | <i>m</i>  | <i>n</i> | <i>o</i> | <i>p</i> | <i>q</i> | <i>r</i> |
| 6FDA-BAPT-6FDA | -0.2471   | 0.1686    | 0.1998    | 0.0273    | -0.0035  | -0.1707  | -0.1222  | 0.1136   | 0.1203   |
|                | <i>a'</i> | <i>b'</i> | <i>c'</i> | <i>d'</i> |          |          |          |          |          |
|                | *         | *         | *         | *         |          |          |          |          |          |

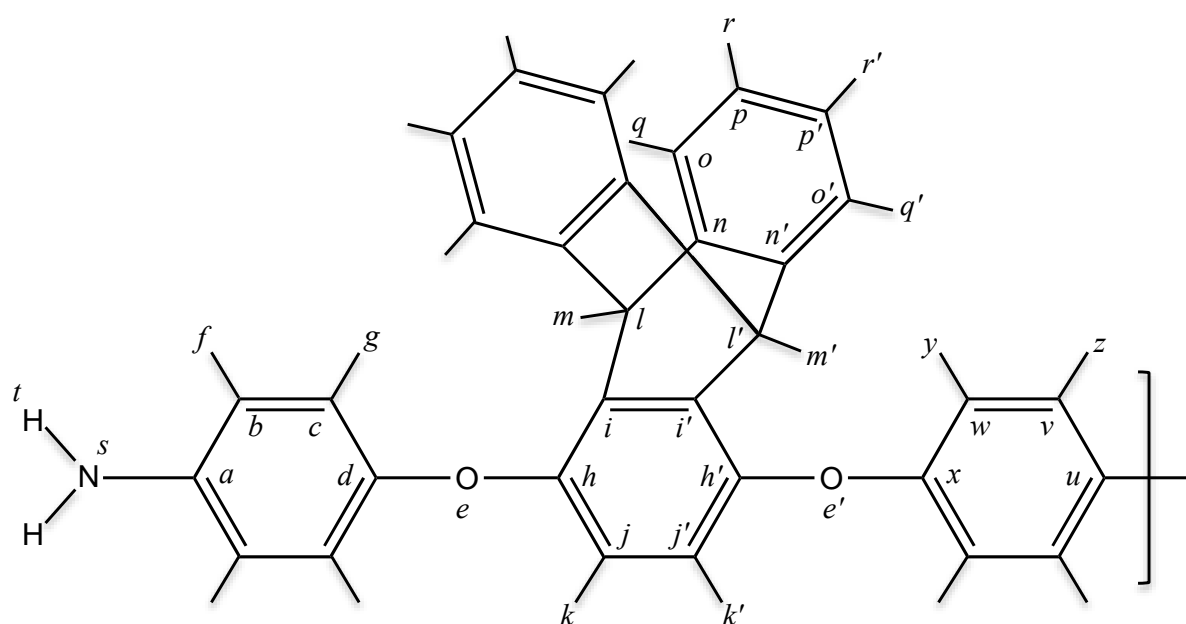

**Figure S4.** Structure of the BAPT start fragment. Letters in italics distinguish the different atoms whose charges are given in Table S4.

**Table S4.** Partial charges, q/e, on the atoms in the BAPT start fragment.

|                             | <i>a</i>  | <i>b</i>  | <i>c</i>  | <i>d</i>  | <i>e</i>  | <i>f</i>  | <i>g</i>  | <i>h</i>  | <i>i</i>  |
|-----------------------------|-----------|-----------|-----------|-----------|-----------|-----------|-----------|-----------|-----------|
|                             | 0.3455    | -0.2613   | -0.2193   | 0.3237    | -0.3195   | 0.1593    | 0.1562    | 0.1809    | -0.0371   |
|                             | <i>j</i>  | <i>k</i>  | <i>l</i>  | <i>m</i>  | <i>n</i>  | <i>o</i>  | <i>p</i>  | <i>q</i>  | <i>r</i>  |
|                             | -0.1930   | 0.1324    | 0.0751    | 0.0561    | 0.0141    | -0.1731   | -0.1177   | 0.1218    | 0.1170    |
|                             | <i>s</i>  | <i>t</i>  | <i>u</i>  | <i>v</i>  | <i>w</i>  | <i>x</i>  | <i>y</i>  | <i>z</i>  | <i>e'</i> |
| <b>BAPT_start-6FDA-BAPT</b> | -0.7809   | 0.3374    | 0.2982    | -0.2517   | -0.1718   | 0.2687    | 0.1389    | 0.1754    | -0.3410   |
|                             | <i>h'</i> | <i>i'</i> | <i>j'</i> | <i>k'</i> | <i>l'</i> | <i>m'</i> | <i>n'</i> | <i>o'</i> | <i>p'</i> |
|                             | 0.2896    | -0.0298   | -0.2873   | 0.1828    | -0.2206   | 0.1505    | 0.0809    | -0.1296   | -0.1454   |
|                             | <i>q'</i> | <i>r'</i> |           |           |           |           |           |           |           |
|                             | 0.1109    | 0.1222    |           |           |           |           |           |           |           |

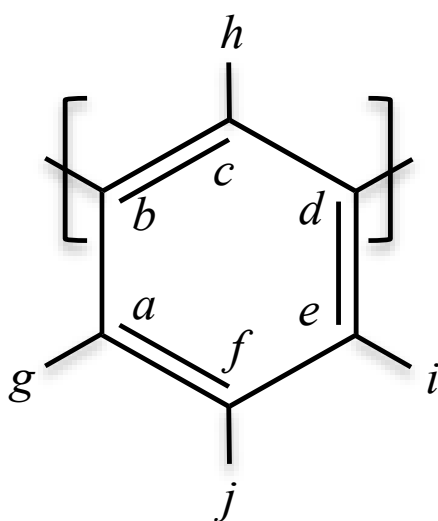

**Figure S5.** Structure of the mPDA fragment. Letters in italics distinguish the different atoms whose charges are given in Table S5.

**Table S5.** Partial charges,  $q/e$ , on the atoms in the mPDA fragment. An asterisk implies the same charge as the symmetrically equivalent atom.

|                | <i>a</i> | <i>b</i> | <i>c</i> | <i>d</i> | <i>e</i> | <i>f</i> | <i>g</i> | <i>h</i> | <i>i</i> | <i>j</i> |
|----------------|----------|----------|----------|----------|----------|----------|----------|----------|----------|----------|
| 6FDA-mPDA-6FDA | -0.3793  | 0.4667   | -0.4975  | *        | *        | 0.0508   | 0.1893   | 0.2387   | *        | 0.1098   |

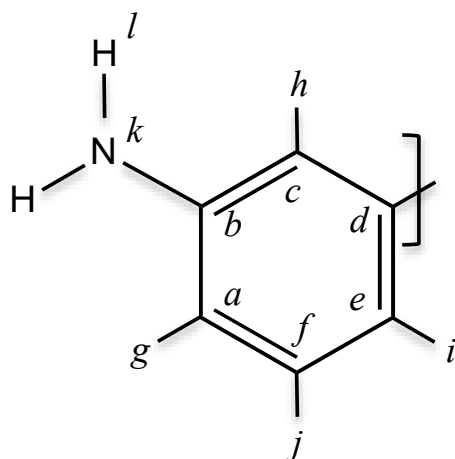**Figure S6.** Structure of the mPDA start fragment. Letters in italics distinguish the different atoms whose charges are given in Table S6.**Table S6.** Partial charges,  $q/e$ , on the atoms in the mPDA end fragment.

|             | <i>a</i> | <i>b</i> | <i>c</i> | <i>d</i> | <i>e</i> | <i>f</i> | <i>g</i> | <i>h</i> | <i>i</i> | <i>j</i> |
|-------------|----------|----------|----------|----------|----------|----------|----------|----------|----------|----------|
| mPDA_start- | -0.3289  | 0.4834   | -0.4748  | 0.4020   | -0.3559  | -0.0176  | 0.1632   | 0.2099   | 0.1764   | 0.1230   |
| 6FDA-mPDA   | <i>k</i> | <i>l</i> |          |          |          |          |          |          |          |          |
|             | -0.7896  | 0.3250   |          |          |          |          |          |          |          |          |



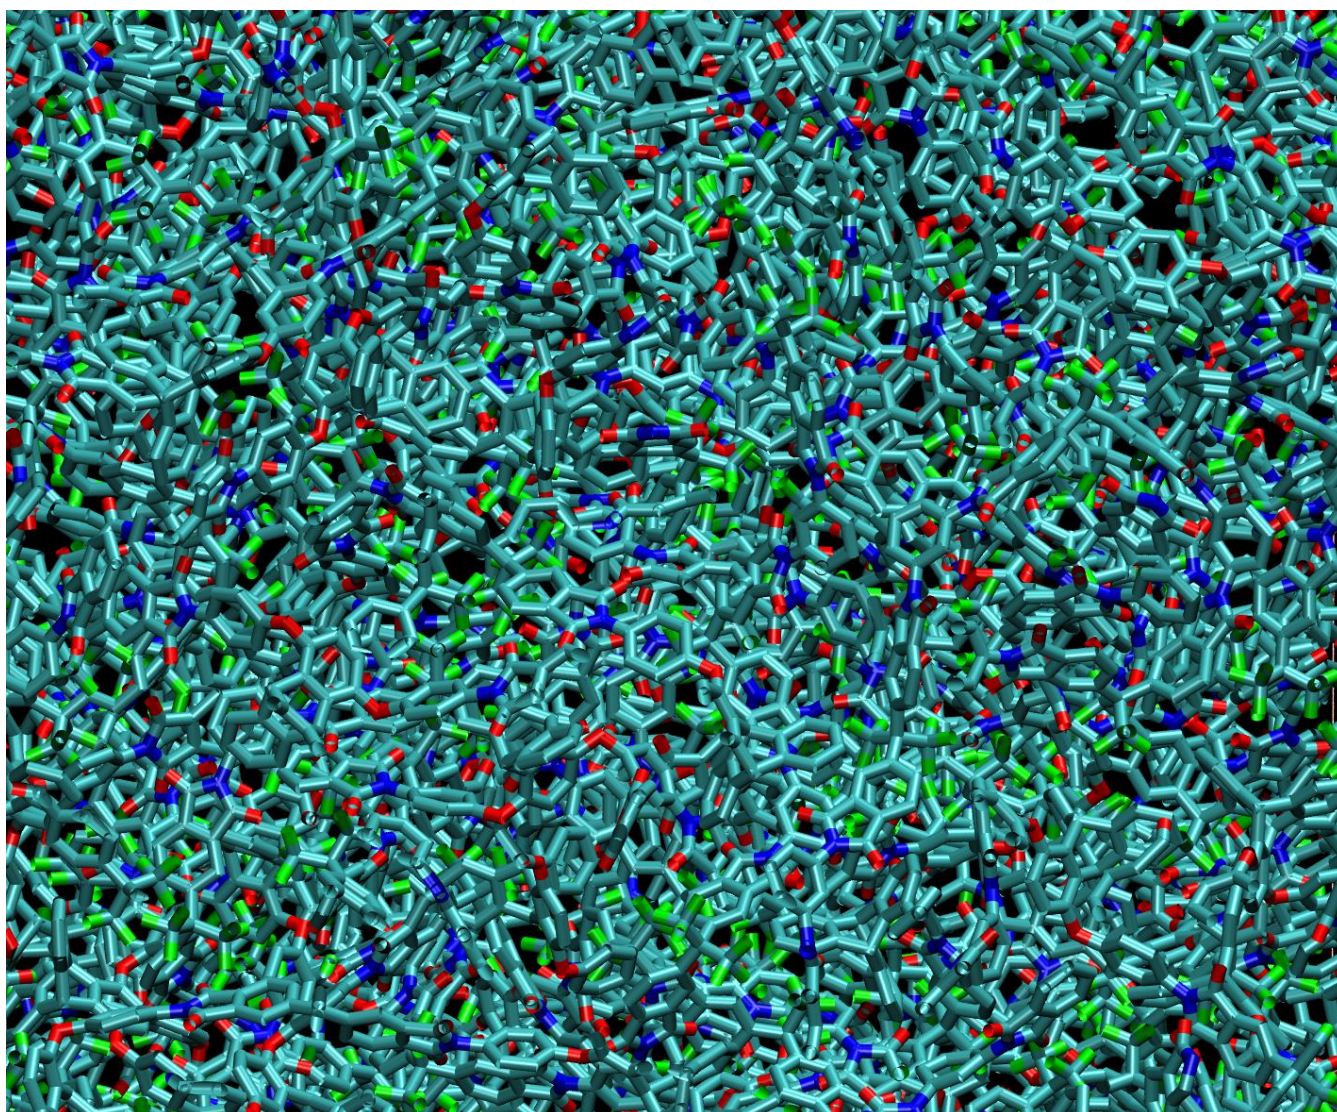

**Figure S7.** Close-up view of the pure (6FDA-mPDA)/(6FDA-BAPT) copolymer system at 338.5 K. For clarity all hydrogens have been omitted. The polymer is presented using bonds with the colour code following: C = cyan, F = lime green, O = red and N = blue. Image created using version 1.9.4 of *VMD* [1].



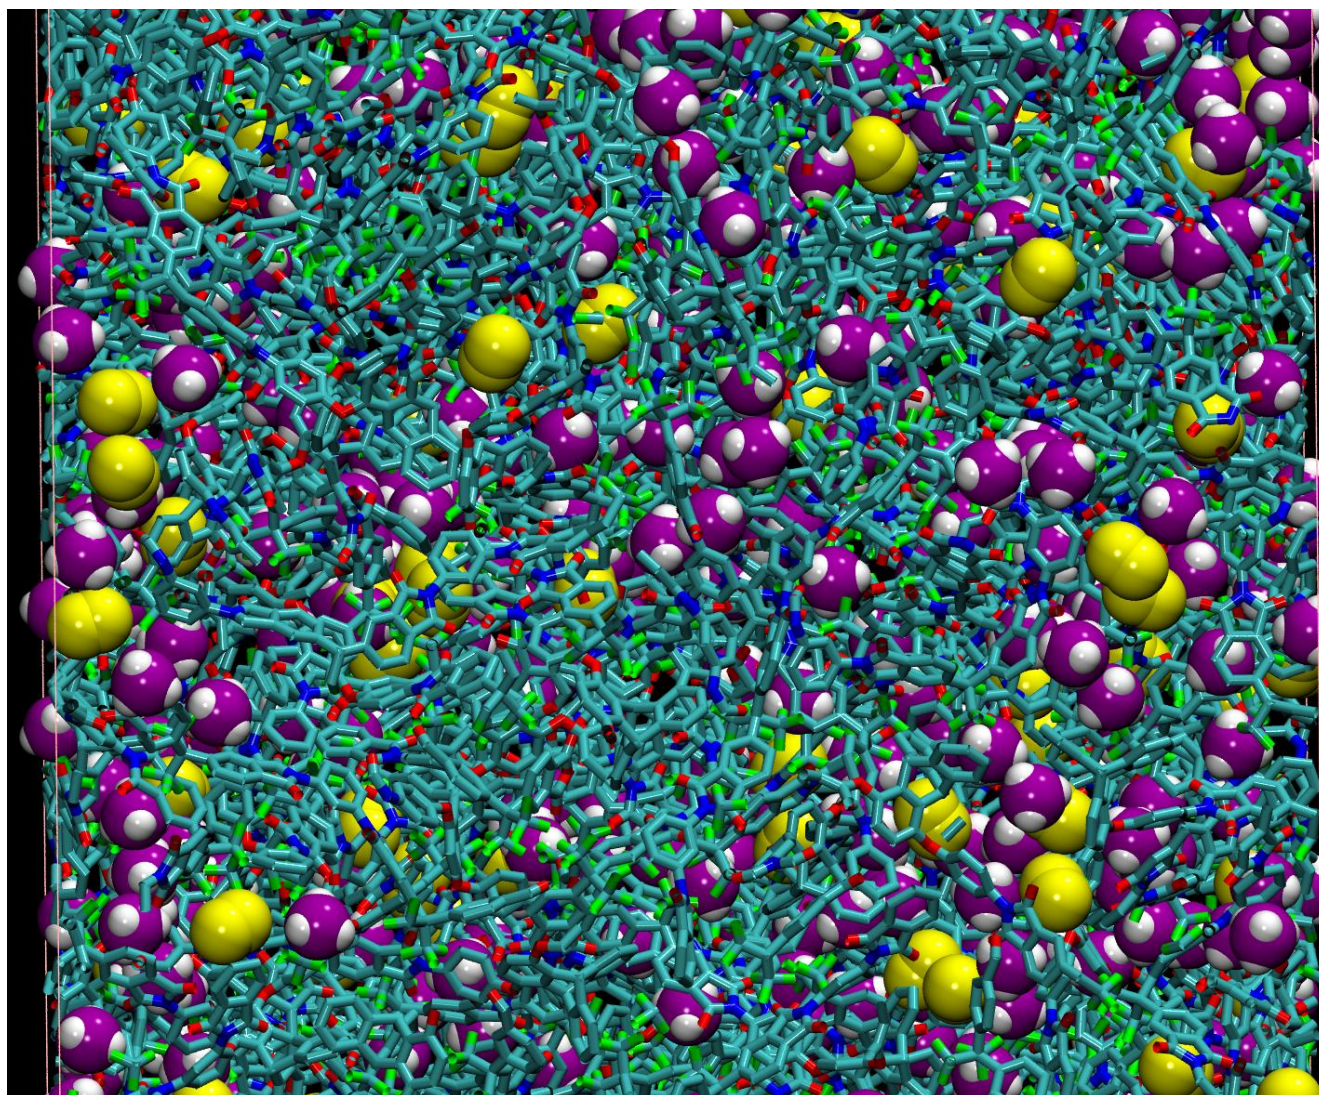

**Figure S8.** Close-up view of the (6FDA-mPDA)/(6FDA-BAPT) mixed gas  $\text{CH}_4/\text{N}_2$  system at 338.5 K and  $p = 65.5$  bar. For clarity all hydrogens in the polymer have been omitted. The polymer is presented using bonds with the colour code following: C = cyan, F = lime green, O = red and N = blue. The penetrant molecules are presented in VDW format. For methane: C = purple and H = white. For nitrogen: N = yellow. Image created using version 1.9.4 of VMD [1].

**Table S7.** Correspondence between the atom-type numbers, the names used in *gmq* and the symbols used in the TRIPOS 5.2 forcefield.

| Atom Type Number | Atom Name in <i>gmq</i> | Atom Type in TRIPOS |
|------------------|-------------------------|---------------------|
| 1                | C <sub>1</sub>          | C <sub>3</sub>      |
| 2                | C <sub>F1</sub>         | C <sub>3</sub>      |
| 3                | C <sub>ar1</sub>        | C <sub>ar</sub>     |
| 4                | C <sub>ket</sub>        | C <sub>2</sub>      |
| 5                | O <sub>ket</sub>        | O <sub>2</sub>      |
| 6                | N                       | N <sub>am</sub>     |
| 7                | F <sub>1</sub>          | F                   |
| 8                | C <sub>ar2</sub>        | C <sub>ar</sub>     |
| 9                | C <sub>2</sub>          | C <sub>3</sub>      |
| 10               | C <sub>F2</sub>         | C <sub>3</sub>      |
| 11               | F <sub>2</sub>          | F                   |

|    |                     |                 |
|----|---------------------|-----------------|
| 12 | C <sub>CH3</sub>    | C <sub>3</sub>  |
| 13 | H <sub>all</sub>    | H               |
| 14 | H <sub>CH3</sub>    | H               |
| 15 | H <sub>term</sub>   | H               |
| 16 | O <sub>3</sub>      | O <sub>3</sub>  |
| 17 | N <sub>3</sub>      | N <sub>3</sub>  |
| 18 | O <sub>tr</sub>     | O <sub>3</sub>  |
| 19 | C <sub>artr</sub>   | C <sub>ar</sub> |
| 20 | O <sub>term</sub>   | O <sub>3</sub>  |
| 21 | C <sub>arfda</sub>  | C <sub>ar</sub> |
| 22 | C <sub>fda</sub>    | C <sub>3</sub>  |
| 23 | C <sub>arbapt</sub> | C <sub>ar</sub> |
| 24 | O <sub>bapt</sub>   | O <sub>3</sub>  |
| 25 | C <sub>bapt</sub>   | C <sub>3</sub>  |

## References

1. Vrabec, J.; Stoll, J.; Hasse, H. A Set of Molecular Models for Symmetric Quadrupolar Fluids. *The Journal of Physical Chemistry B* **2001**, *105*, 12126–12133, doi:10.1021/jp012542o.
2. Ciccotti, G.; Ferrario, M.; Ryckaert, J.P. Molecular dynamics of rigid systems in cartesian coordinates A general formulation. *Molecular Physics* **1982**, *47*, 1253–1264, doi:10.1080/00268978200100942.
3. Tanis, I.; Brown, D.; Neyertz, S.; Heck, R.; Mercier, R.; Vaidya, M.; Ballaguet, J.-P. A comparison of pure and mixed-gas permeation of nitrogen and methane in 6FDA-based polyimides as studied by molecular dynamics simulations. *Computational Materials Science* **2018**, *141*, 243–253, doi:https://doi.org/10.1016/j.commatsci.2017.09.028.
4. Yin, D.; MacKerell, A.D. Combined ab initio/empirical approach for optimization of Lennard–Jones parameters. *Journal of Computational Chemistry* **1998**, *19*, 334–348, doi:10.1002/(sici)1096-987x(199802)19:3<334::aid-jcc7>3.0.co;2-u.
5. Humphrey, W., Dalke, A. and Schulten, K., VMD - Visual Molecular Dynamics, *J. Molec. Graphics* **1996**, *14*, 1, 33–38.

**Disclaimer/Publisher's Note:** The statements, opinions and data contained in all publications are solely those of the individual author(s) and contributor(s) and not of MDPI and/or the editor(s). MDPI and/or the editor(s) disclaim responsibility for any injury to people or property resulting from any ideas, methods, instructions or products referred to in the content.
